# Supplementary material for: Finding consensus on frailty assessment in acute care through Delphi method
Source: PubMed Central journal article supplement (PMC5073579; doi:10.1136/bmjopen-2016-012904), 2016-10-14
Supplement: bmjopen-2016-012904supp_appendices.pdf [file bmjopen-2016-012904supp_appendices.pdf]

Appendix 1: Variables associated with frailty by model type

|                                     |                                                                                                                                                                                                                                                                                             |
|-------------------------------------|---------------------------------------------------------------------------------------------------------------------------------------------------------------------------------------------------------------------------------------------------------------------------------------------|
| <b>Social demographics</b>          | Age<br>Social Deprivation<br>Gender                                                                                                                                                                                                                                                         |
| <b>Phenotype model</b>              | Unintended weight loss<br>Self-reported exhaustion<br>Weakness<br>Slow walking speed<br>Low physical activity                                                                                                                                                                               |
| <b>High intensity service usage</b> | Recent hospital admission episodes<br>Multiple hospital admission episodes<br>Large package of care at home<br>Care home resident                                                                                                                                                           |
| <b>*Geriatric syndromes</b>         | Functional dependence*<br>Pressure ulcer risk*<br>Impaired cognition*<br>Incontinence*<br>Impaired mobility*<br>Falls*<br>Social isolation<br>Nutritional status<br>Multiple morbidity<br>Polypharmacy<br>Generalised anxiety and/or depression<br>Impaired vision<br>Impaired hearing      |
| <b>Accumulated Deficits model</b>   |                                                                                                                                                                                                                                                                                             |
| <b>Trap question</b>                | Chronic lung disease                                                                                                                                                                                                                                                                        |
| <b>Bio-gerontological model</b>     | Chronic Inflammation (e.g. Raised serum IL-6)<br>Coagulopathy (e.g. Raised Factor VII/VIII levels)<br>Steroid hormone dysregulation (e.g. Low levels of DHEAS)<br>Low peripheral skeletal muscle bulk (e.g. peripheral quantitative computerized tomography (PQCT))<br>Low vitamin D levels |

Appendix 2: Participants of the modified Delphi analysis

| Round 1(n=16)              |              |              | Round 2(n=41)                 |              |              |
|----------------------------|--------------|--------------|-------------------------------|--------------|--------------|
| Position                   | Female       | Male         | Position                      | Female       | Male         |
| Consultant Physician other | 6.3%         | 12.5%        | Academic                      | 4.9%         | 2.4%         |
| Clinical psychologist      | 0.0%         | 6.3%         | Care Manager                  | 2.4%         | 0.0%         |
| Consultant Geriatrician    | 12.5%        | 25.0%        | Chief Executive - Social Care | 2.4%         | 0.0%         |
| Consultant Psychiatrist    | 0.0%         | 6.3%         | Consultant Geriatrician       | 12.2%        | 9.8%         |
| Dietician                  | 6.3%         | 0.0%         | Consultant Physician other    | 7.3%         | 14.6%        |
| Pharmacist                 | 12.5%        | 6.3%         | Dietician                     | 2.4%         | 0.0%         |
| Physiotherapist            | 0.0%         | 6.3%         | GP                            | 0.0%         | 2.4%         |
| <b>Grand Total</b>         | <b>37.5%</b> | <b>62.5%</b> | Nurse                         | 4.9%         | 0.0%         |
|                            |              |              | Pharmacist                    | 4.9%         | 0.0%         |
|                            |              |              | Physiotherapist               | 9.8%         | 2.4%         |
|                            |              |              | Researcher                    | 2.4%         | 2.4%         |
|                            |              |              | Specialist Charity            | 0.0%         | 2.4%         |
|                            |              |              | Specialist Trainee            | 7.3%         | 2.4%         |
|                            |              |              | <b>Grand Total</b>            | <b>61.0%</b> | <b>39.0%</b> |

### Appendix 3: Frailty indicators ranked by perceived utility in acute care by the end of round 2

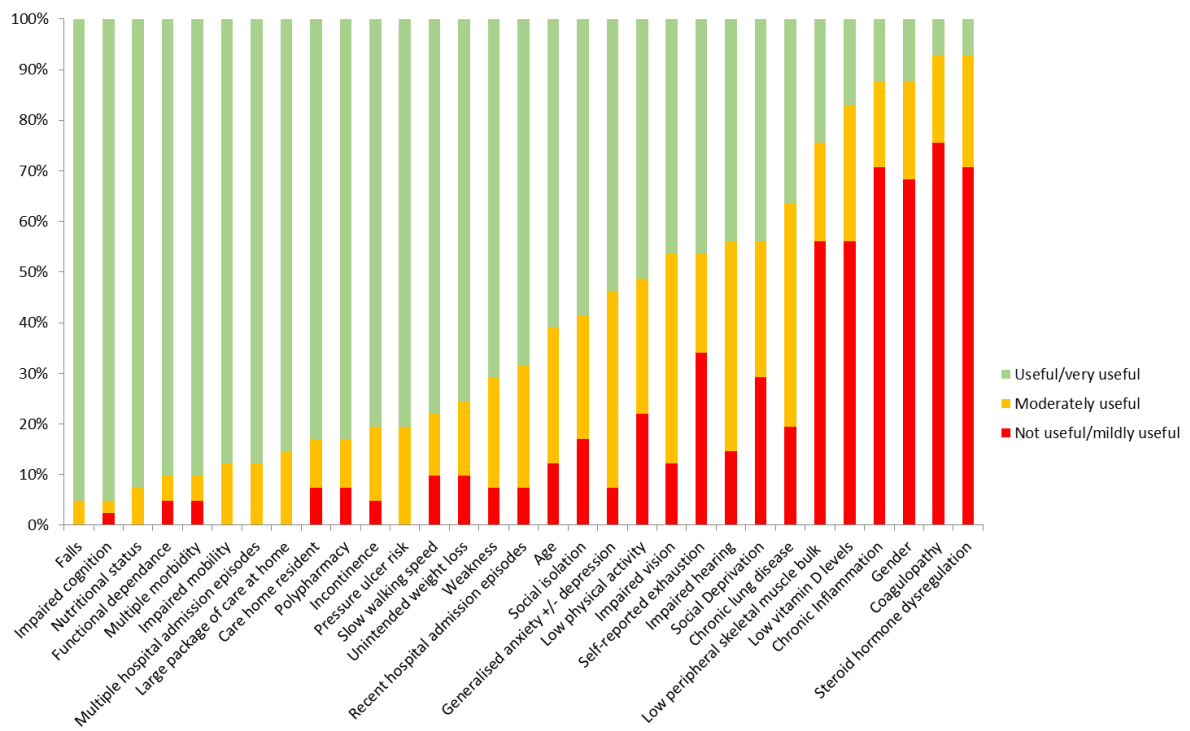

#### Appendix 4: Summary of frailty scores and criteria used within the acute care setting

| Tool Name<br>(If applicable)                                            | Frailty Criteria                                                                                                                                                                                                                                                                                                                                                                                                                                                                                                                                                                                                                                                                                                      | Frailty Assessment Context                                            | Description                                                                                                                                                                                                     |
|-------------------------------------------------------------------------|-----------------------------------------------------------------------------------------------------------------------------------------------------------------------------------------------------------------------------------------------------------------------------------------------------------------------------------------------------------------------------------------------------------------------------------------------------------------------------------------------------------------------------------------------------------------------------------------------------------------------------------------------------------------------------------------------------------------------|-----------------------------------------------------------------------|-----------------------------------------------------------------------------------------------------------------------------------------------------------------------------------------------------------------|
| NA                                                                      | <ol style="list-style-type: none"> <li>1. Cerebrovascular accident</li> <li>2. Chronic and disabling illness</li> <li>3. Confusion</li> <li>4. Dependence in ADLs</li> <li>5. Depression</li> <li>6. Falls</li> <li>7. Impaired mobility</li> <li>8. Incontinence</li> <li>9. Malnutrition</li> <li>10. Polypharmacy</li> <li>11. Pressure Sore</li> <li>12. Prolonged bedrest</li> <li>13. Restraints</li> <li>14. Sensory impairment</li> <li>15. Socioeconomic/family problems</li> </ol>                                                                                                                                                                                                                          | Not Clear                                                             | <p>Independent:<br/>Independent in all ADLs with short term acute illness</p> <p>Frail: meets any one of the criteria</p> <p>Severely impaired:<br/>Severe dementia and ADL dependence<br/>Terminal illness</p> |
| Identification of Seniors at Risk (ISAR)                                | <ol style="list-style-type: none"> <li>1. "Before the illness or injury that brought you to the emergency department, did you need someone to help you on a regular basis?" (Y/N)</li> <li>2. "Since the illness or injury that brought you to the emergency department, have you needed more help than usual to take care of yourself?" (Y/N)</li> <li>3. "Have you been hospitalized for one or more nights during the past 6 months (excluding a stay in the emergency department)?" (Y/N)</li> <li>4. "In general, do you see well?" (Y/N)</li> <li>5. "In general, do you have serious problems with your memory?" (Y/N)</li> <li>6. "Do you take more than 2 different medications every day?" (Y/N)</li> </ol> | <p>On attendance to ED</p> <p>Within 72 hours of admission on AMU</p> | ≥2 criteria                                                                                                                                                                                                     |
| Hong Kong-Identification of Seniors at Risk (HK-ISAR)                   | <ol style="list-style-type: none"> <li>1. "Before the illness or injury that brought you to the emergency department, did you have any health problems that required you to limit your activities?"</li> <li>2. "Have you visited a hospital emergency department during the past month?"</li> <li>3. "Have you been hospitalised for one or more nights during the past 6 months?"</li> <li>4. "Do you take more than two different medications every day?"</li> <li>5. "In case of need, can you count on someone close to you?"</li> </ol> <p>"Do you usually have enough income to meet your daily needs?"</p>                                                                                                    | On discharge home from ED                                             | ≥2                                                                                                                                                                                                              |
| <p>Triage Risk Screening Tool (TRST)</p> <p>5-item</p><br><p>6-item</p> | <ol style="list-style-type: none"> <li>1. History or evidence of cognitive impairment (poor recall or not oriented)</li> <li>2. Difficulty walking/transferring or recent falls</li> <li>3. ≥ 5 medications</li> <li>4. ED use in previous 30 days or hospitalization in previous 90 days</li> <li>5. Emergency department nurse concern for elder abuse/neglect, substance abuse, medication noncompliance, problems meeting instrumental activities of daily living, or other</li> <li>6. <i>lives alone/no caregiver</i></li> </ol>                                                                                                                                                                                | On attendance to ED                                                   | ≥ 2 criteria                                                                                                                                                                                                    |



|                                                                                                                 |                                                                                                                                                                                                                                                                                                                                                                                                                                                                                                                                                                                                                                                                                                                                                                                                                                                                        |                                                                                                                                                                                                                                                                                                                        |                                                                  |
|-----------------------------------------------------------------------------------------------------------------|------------------------------------------------------------------------------------------------------------------------------------------------------------------------------------------------------------------------------------------------------------------------------------------------------------------------------------------------------------------------------------------------------------------------------------------------------------------------------------------------------------------------------------------------------------------------------------------------------------------------------------------------------------------------------------------------------------------------------------------------------------------------------------------------------------------------------------------------------------------------|------------------------------------------------------------------------------------------------------------------------------------------------------------------------------------------------------------------------------------------------------------------------------------------------------------------------|------------------------------------------------------------------|
| NA                                                                                                              | <ol style="list-style-type: none"> <li>1. Age <math>\geq</math> 85(Y/N)</li> <li>2. (Gender(M/F))*</li> <li>3. Dependent for ADL(Y/N)</li> <li>4. Delirium(Y/N)</li> <li>5. Malnutrition risk(Y/N)</li> <li>6. Co-morbidity: Charlson Score 0-1</li> <li>7. Charlson Score 2-4</li> <li>8. Charlson Score <math>\geq</math>5</li> <li>9. Perceived health Scale(Duke Health Profile)-10pt increase</li> <li>10. Number of children<math>\geq</math>2<math>\pm</math></li> <li>11. Living alone<math>\pm</math></li> </ol> <p>*For mortality model<br/> <math>\pm</math>For Nursing Home Placement</p>                                                                                                                                                                                                                                                                  | After admission, not clear                                                                                                                                                                                                                                                                                             | NA                                                               |
| Method for Assigning Priority Levels for Acute Care (MAPLe-AC)                                                  | <ol style="list-style-type: none"> <li>1. ADL impairment cognitive impairment behavior</li> <li>2. disturbance (verbally or physically abusive, socially inappropriate behavior, resists care)</li> <li>3. decline in decision making</li> <li>4. problems with medication management</li> <li>5. pressure</li> <li>6. ulcers</li> <li>7. falls</li> <li>8. problems with meal preparation</li> <li>9. difficulty</li> <li>10. swallowing</li> </ol>                                                                                                                                                                                                                                                                                                                                                                                                                   | First 24 hours of hospital admission                                                                                                                                                                                                                                                                                   | Algorithm based interaction of criteria to form 5 levels of risk |
| Frailty Phenotype                                                                                               | <ol style="list-style-type: none"> <li>1. Weakness: The maximum of the three grip strength using a dynamometer attempts was adjusted for gender and body mass index and lowest decile as cut off or self-reported</li> <li>2. Slowness: Time to complete the 15-foot walk at normal pace was recorded and adjusted for gender and height using the same cutoffs for the lowest 20% or self-reported</li> <li>3. Weight Loss: "In the past year, have you lost more than 10 pounds unintentionally (i.e., not due to diet or exercise)?"</li> <li>4. Exhaustion: "Before the illness or injury that brought me to the ED, I felt that everything I did was an effort" and "Before the illness or injury that brought me to the ED, I felt that I could not get going"</li> <li>5. Physical inactivity: by Rapid Assessment of Physical Activity (RAPA) scale</li> </ol> | <p>On discharge home from ED</p> <p>Within 72 hours of admission on AMU</p> <p>On discharge home from ED</p>                                                                                                                                                                                                           | $\geq$ 3                                                         |
| The Study of Osteoporotic Fractures(SOF) Frailty Index derived from the Study of Osteoporotic Fractures(FI-SOF) | <ol style="list-style-type: none"> <li>1. weight loss (5% loss either intentional or unintentional over the last year)</li> <li>2. self-report of low energy</li> <li>3. low mobility (unable to rise from a chair five times)</li> </ol>                                                                                                                                                                                                                                                                                                                                                                                                                                                                                                                                                                                                                              | <p>Not clear; During their stay on Geriatric Evaluation and Management Unit (GEMU): a specialised ward designed to optimise a patient's chance of recovery following acute admission; Pre-selected for entry predominantly from Acute Medical Unit using the clinical judgement of geriatricians</p> <p>Not clear;</p> | SOF $\geq$ 2                                                     |

|                                                                         |                                                                                                                                                                                                                                                                                                                                                                                                                                                                                                                                                                                                                                                                                                                                                                                                                                                                                                                                                                                                                                                                                                                                                                                                                                                                                                                                                                                                                                                                                                                                                                                                                                                                                                                                       |                                                                                                                                                                                                                                                                                                                                                                                                                                                            |                                        |
|-------------------------------------------------------------------------|---------------------------------------------------------------------------------------------------------------------------------------------------------------------------------------------------------------------------------------------------------------------------------------------------------------------------------------------------------------------------------------------------------------------------------------------------------------------------------------------------------------------------------------------------------------------------------------------------------------------------------------------------------------------------------------------------------------------------------------------------------------------------------------------------------------------------------------------------------------------------------------------------------------------------------------------------------------------------------------------------------------------------------------------------------------------------------------------------------------------------------------------------------------------------------------------------------------------------------------------------------------------------------------------------------------------------------------------------------------------------------------------------------------------------------------------------------------------------------------------------------------------------------------------------------------------------------------------------------------------------------------------------------------------------------------------------------------------------------------|------------------------------------------------------------------------------------------------------------------------------------------------------------------------------------------------------------------------------------------------------------------------------------------------------------------------------------------------------------------------------------------------------------------------------------------------------------|----------------------------------------|
|                                                                         |                                                                                                                                                                                                                                                                                                                                                                                                                                                                                                                                                                                                                                                                                                                                                                                                                                                                                                                                                                                                                                                                                                                                                                                                                                                                                                                                                                                                                                                                                                                                                                                                                                                                                                                                       | During hospital admission on geriatric units<br><br>Within 72 hours of admission on AMU                                                                                                                                                                                                                                                                                                                                                                    |                                        |
| Fatigue, Resistance, Ambulation, Illness, Loss of Weight index (FRAIL), | <ol style="list-style-type: none"> <li>1. fatigue (self-report)</li> <li>2. resistance (unable to rise from a chair five times)</li> <li>3. ambulation (slow walking speed)</li> <li>4. illnesses (<math>\geq 5</math> illnesses on Charlson's comorbidity index (CCI))</li> <li>5. loss of weight of 5% or more in the past year.</li> </ol>                                                                                                                                                                                                                                                                                                                                                                                                                                                                                                                                                                                                                                                                                                                                                                                                                                                                                                                                                                                                                                                                                                                                                                                                                                                                                                                                                                                         | Not clear; During their stay on Geriatric Evaluation and Management Unit (GEMU): a specialised ward designed to optimise a patient's chance of recovery following acute admission; Pre-selected for entry predominantly from Acute Medical Unit using the clinical judgement of geriatricians                                                                                                                                                              | FRAIL $\geq 3$                         |
| frailty index of cumulative deficits FI-CD                              | <p>FI-CD<br/>Help Bathing, Help Dressing, Help Transferring From a Bed to Chair and Back, Help Walking Around Home, Help Eating, Help Grooming, Help Toileting, Help Using Telephone, Help Shopping, Help Food Preparation, Help Housekeeping, Help Laundry, Help with Transportation, Help taking Medications, Help with Finances, Psychological Stress/Acute Disease in Last 3 Months, Previous Myocardial Infarction, Chronic Heart Failure, Peripheral Vascular Disease, Previous Stroke, Chronic Obstructive Pulmonary Disease, Renal Failure, Tumour, Diabetes, Orthostatic Hypotension, Pressure Sore or Skin Ulcer, Depression, Anxiety, Hearing Difficulty, Unable to Drive, Difficulty Chewing or Swallowing, Poor Dentition, Self-Reported Poor Health, Weight Loss &gt; 4.5 kg in past year, Appetite, Self Report: "Everything is an effort", Self Report: "Could not get going", Low Physical Activity, Lives Alone, Low Community Mobility, Slow Walking Speed, Falls in Previous Year, Low Quality of Life, Mini Mental State Examination, Low Mid-Arm Circumference, Low Calf Circumference, Low Body Mass Index, Grip Strength, Low Protein Consumption, Self Reported Malnutrition</p> <p>FI-CD:<br/>32 items: difficulty with eating, dressing, walk around, getting in/out bed, getting bath, toileting, using telephone, going out, shopping, cooking, light house work, taking medicine, managing money, arthritis, Parkinson's disease, glaucoma, diabetes, stomach problems, history of heart attack, hypertension, history of stroke, flu, broken hip, broken bones, trouble with bladder/bowels, dementia, self-rated health, as well as problems with vision, hearing, ear, teeth, and feet</p> <p>FI</p> | <p>Not clear; During their stay on Geriatric Evaluation and Management Unit (GEMU): a specialised ward designed to optimise a patient's chance of recovery following acute admission; Pre-selected for entry predominantly from Acute Medical Unit using the clinical judgement of geriatricians</p> <p>Not clear; During hospital admission on geriatric units</p> <p>Within 72 hours of admission on AMU</p> <p>First 24 hours of hospital admission</p> | <p>FI-CD&gt;0.45</p> <p>FI&gt;0.25</p> |

|                                                                                 |                                                                                                                                                                                                                                                                                                                                                                                                                                                               |                                                                                                                                                                                                                                                                                                                                                                 |                                                                                                                       |
|---------------------------------------------------------------------------------|---------------------------------------------------------------------------------------------------------------------------------------------------------------------------------------------------------------------------------------------------------------------------------------------------------------------------------------------------------------------------------------------------------------------------------------------------------------|-----------------------------------------------------------------------------------------------------------------------------------------------------------------------------------------------------------------------------------------------------------------------------------------------------------------------------------------------------------------|-----------------------------------------------------------------------------------------------------------------------|
|                                                                                 | FI-AC: Not clear                                                                                                                                                                                                                                                                                                                                                                                                                                              |                                                                                                                                                                                                                                                                                                                                                                 |                                                                                                                       |
| FI-CGA                                                                          | 55 variables (binary and ordinal) encompassing:<br>Cognitive Status, Delirium, Depression, Anxiety, Fatigue, Emotional Other, Motivation, Health Attitude, Speech, Hearing, Vision, Strength, Sleep, Daytime Drowsiness, Transfer, Walking, Aid, Balance, Falls, Falls Number, Bowel, Bladder, Weight, Appetite, Feeding, Bathing, Dressing, Toileting, Cooking, Cleaning, Shopping, Medication use, Driving, Banking, Medical problems, Count of medications | First 24 hours of hospital admission                                                                                                                                                                                                                                                                                                                            | FI<0.35 Not frail<br>FI-CGA 0.35-0.45 Mildly Frail<br>FI-CGA 0.46-0.55 Moderately Frail<br>FI-CGA>0.55 Severely Frail |
| Frailty Index based on Ten Domain Comprehensive Geriatric Assessment(FI-CGA-10) | Ordinal<br>1. Cognition (MMSE)<br>2. mood and motivation (GDS-15)<br>3. hearing or sight problem<br>4. mobility (6 m walk time)<br>5. balance (standing ability)<br>6. bowel function<br>7. bladder function<br>8. function<br>9. ADLs<br>10. IADLs<br>11. nutritional status (MNA)<br>12. social resources                                                                                                                                                   | Not clear; During their stay on Geriatric Evaluation and Management Unit (GEMU):<br>a specialised ward designed to optimise a patient's chance of recovery following acute admission; Pre-selected for entry predominantly from Acute Medical Unit using the clinical judgement of geriatricians<br><br>Not clear; During hospital admission on geriatric units | FI-CGA-10>13                                                                                                          |
| Score Hospitalier d'Evaluation du Risque de Perte d'Autonomie index (SHERPA);   | 1. falls in the previous year<br>2. MMSE (first 21 questions)<br>3. bad self-perceived health<br>4. Age<br>5. ADL                                                                                                                                                                                                                                                                                                                                             | Not clear; During their stay on Geriatric Evaluation and Management Unit (GEMU):<br>a specialised ward designed to optimise a patient's chance of recovery following acute admission; Pre-selected for entry predominantly from Acute Medical Unit using the clinical judgement of geriatricians                                                                | SHERPA>6                                                                                                              |
| Multidimensional Prognostic Index(MPI)                                          | Ordinal:<br>1. Activities of Daily Living<br>2. Instrumental activities of daily living<br>3. Short Portable Mental Status Questionnaire<br>4. Co-morbidity index<br>5. Mini Nutritional assessment<br>6. Exton Smith Scale/Braden skin assessment<br>7. Number of medications<br>8. Social Support Network                                                                                                                                                   | Not clear; During their stay on Geriatric Evaluation and Management Unit (GEMU):<br>a specialised ward designed to optimise a patient's chance of recovery following acute admission; Pre-selected for entry predominantly from Acute Medical Unit using the clinical judgement of geriatricians<br><br>During hospital admission on geriatric units            | MPI>0.66                                                                                                              |



|                                                        |                                                                                                                                                                                                                                                                                                                                                                                                                                                                                                                                                                                                        |                                                                                                                                                                                                                                                                                               |                           |
|--------------------------------------------------------|--------------------------------------------------------------------------------------------------------------------------------------------------------------------------------------------------------------------------------------------------------------------------------------------------------------------------------------------------------------------------------------------------------------------------------------------------------------------------------------------------------------------------------------------------------------------------------------------------------|-----------------------------------------------------------------------------------------------------------------------------------------------------------------------------------------------------------------------------------------------------------------------------------------------|---------------------------|
| hospital admissions risk profile(HARP)                 | Ordinal<br>1. Age<br>2. MMSE-21<br>3. IADL                                                                                                                                                                                                                                                                                                                                                                                                                                                                                                                                                             | Not clear; During their stay on Geriatric Evaluation and Management Unit (GEMU): a specialised ward designed to optimise a patient's chance of recovery following acute admission; Pre-selected for entry predominantly from Acute Medical Unit using the clinical judgement of geriatricians | HARP≥4                    |
| Adapted Katz index                                     | Dependency for<br>1. feeding<br>2. washing<br>3. grooming<br>4. dressing<br>5. toileting<br>6. transferring from a bed or chair and walking                                                                                                                                                                                                                                                                                                                                                                                                                                                            | Not clear; During their stay on Geriatric Evaluation and Management Unit (GEMU): a specialised ward designed to optimise a patient's chance of recovery following acute admission; Pre-selected for entry predominantly from Acute Medical Unit using the clinical judgement of geriatricians | Adapted Katz≥1            |
| Lawton's instrumental Activities of Daily Living Scale | Dependency for<br>1. telephoning<br>2. shopping<br>3. food preparation<br>4. housekeeping<br>5. laundry<br>6. transport<br>7. medication<br>8. finances                                                                                                                                                                                                                                                                                                                                                                                                                                                | Not clear; During their stay on Geriatric Evaluation and Management Unit (GEMU): a specialised ward designed to optimise a patient's chance of recovery following acute admission; Pre-selected for entry predominantly from Acute Medical Unit using the clinical judgement of geriatricians | Lawton IADL≥3             |
| Charlson Co-morbidity Index(CCI)                       | 1. Myocardial Infarction<br>2. Congestive Heart Failure<br>3. Peripheral Vascular Disease<br>4. Cerebrovascular Disease<br>5. Dementia<br>6. COPD<br>7. Connective Tissue Disease<br>8. Peptic Ulcer Disease<br>9. Diabetes Mellitus (1 point uncomplicated, 2 points if end-organ damage)<br>10. Moderate to Severe Chronic Kidney Disease (2 points)<br>11. Hemiplegia (2 points)<br>12. Leukaemia (2 points)<br>13. Malignant Lymphoma (2 points)<br>14. Solid Tumour (2 points, 6 points if metastatic)<br>15. Liver Disease (1 point mild, 3 points if moderate to severe)<br>16. AIDS (6 points) | Not clear; During their stay on Geriatric Evaluation and Management Unit (GEMU): a specialised ward designed to optimise a patient's chance of recovery following acute admission; Pre-selected for entry predominantly from Acute Medical Unit using the clinical judgement of geriatricians | CCI≥5                     |
| NA                                                     | Grip Strength                                                                                                                                                                                                                                                                                                                                                                                                                                                                                                                                                                                          | Not clear; During their stay on Geriatric                                                                                                                                                                                                                                                     | Grip strength <18kg women |

|                             |                                                                                                                                                                                                                                                                                                                                                                                                                                                                                                                                                                                                                                                                                                            |                                                                                                                                                                                                                                                                                                                                                                         |                               |
|-----------------------------|------------------------------------------------------------------------------------------------------------------------------------------------------------------------------------------------------------------------------------------------------------------------------------------------------------------------------------------------------------------------------------------------------------------------------------------------------------------------------------------------------------------------------------------------------------------------------------------------------------------------------------------------------------------------------------------------------------|-------------------------------------------------------------------------------------------------------------------------------------------------------------------------------------------------------------------------------------------------------------------------------------------------------------------------------------------------------------------------|-------------------------------|
|                             |                                                                                                                                                                                                                                                                                                                                                                                                                                                                                                                                                                                                                                                                                                            | Evaluation and Management Unit (GEMU): a specialised ward designed to optimise a patient's chance of recovery following acute admission; Pre-selected for entry predominantly from Acute Medical Unit using the clinical judgement of geriatricians                                                                                                                     | <30kg men                     |
| NA                          | Walking Speed                                                                                                                                                                                                                                                                                                                                                                                                                                                                                                                                                                                                                                                                                              | Not clear; During their stay on Geriatric Evaluation and Management Unit (GEMU): a specialised ward designed to optimise a patient's chance of recovery following acute admission; Pre-selected for entry predominantly from Acute Medical Unit using the clinical judgement of geriatricians                                                                           | Walking speed <30s to walk 6m |
| Ávila-Funes                 | Phenotype(see above) AND Cognitive impairment – MMSE lowest 25%                                                                                                                                                                                                                                                                                                                                                                                                                                                                                                                                                                                                                                            | Within 72 hours of admission on AMU                                                                                                                                                                                                                                                                                                                                     | Ávila-Funes≥3                 |
| Rothman                     | <ol style="list-style-type: none"> <li>1. Mobility- Gait speed of &gt;10 s to walk back and forth over a 10 foot course</li> <li>2. Physical Activity- Score &lt;64 for men, &lt;52 for women on the physical activity scale for the elderly</li> <li>3. Nutritional Status Weight loss &gt; 10lbs in past year (intentional and unintentional)</li> <li>4. Cognition MMSE&lt;24</li> </ol>                                                                                                                                                                                                                                                                                                                | Within 72 hours of admission on AMU                                                                                                                                                                                                                                                                                                                                     | Rothman's≥2                   |
| Clinical Frailty Scale(CFS) | <p>1 Very Fit – People who are robust, active, energetic and motivated. These people commonly exercise regularly. They are among the fittest for their age.</p> <p>2 Well – People who have no active disease symptoms but are less fit than category 1. Often, they exercise or are very active occasionally, e.g. seasonally.</p> <p>3 Managing Well – People whose medical problems are well controlled, but are not regularly active beyond routine walking.</p> <p>4 Vulnerable – While not dependent on others for daily help, often symptoms limit activities. A common complaint is being “slowed up”, and/or being tired during the day.</p> <p>5 Mildly Frail – These people often have more</p> | <p>Within 72 hours of admission on AMU</p> <p>Not clear; during inpatient stay on general internal medicine ward</p> <p>Not clear; during inpatient stay under geriatricians based on geriatric targeting criteria that included delirium, deconditioning, functional impairment, gait abnormality and falls, multiple medical diagnoses, and psychosocial problems</p> | CFS>6                         |

|                                                                                                            |                                                                                                                                                                                                                                                                                                                                                                                                                                                                                                                                                                                                                                                                                                                                                                                                                                                                                                                                                                                                 |                                    |                          |
|------------------------------------------------------------------------------------------------------------|-------------------------------------------------------------------------------------------------------------------------------------------------------------------------------------------------------------------------------------------------------------------------------------------------------------------------------------------------------------------------------------------------------------------------------------------------------------------------------------------------------------------------------------------------------------------------------------------------------------------------------------------------------------------------------------------------------------------------------------------------------------------------------------------------------------------------------------------------------------------------------------------------------------------------------------------------------------------------------------------------|------------------------------------|--------------------------|
|                                                                                                            | <p>evident slowing, and need help in high order IADLs (finances, transportation, heavy housework, medications). Typically, mild frailty progressively impairs shopping and walking outside alone, meal preparation and housework.</p> <p>6 Moderately Frail – People need help with all outside activities and with keeping house. Inside, they often have problems with stairs and need help with bathing and might need minimal assistance (cuing, standby) with dressing.</p> <p>7 Severely Frail – Completely dependent for personal care, from whatever cause (physical or cognitive). Even so, they seem stable and not at high risk of dying (within ~ 6 months).</p> <p>8 Very Severely Frail – Completely dependent, approaching the end of life. Typically, they could not recover even from a minor illness.</p> <p>9. Terminally Ill - Approaching the end of life. This category applies to people with a life expectancy &lt;6 months, who are not otherwise evidently frail.</p> |                                    |                          |
| Stable gait, Unstable gait, needed Help to walk or was Bedridden (SUHB scale)                              | <p>SUHB* Corresponds to Clinical Frailty Scale</p> <ol style="list-style-type: none"> <li>1. Walking unaided – steady</li> <li>2. Walking unaided – unsteady</li> <li>3. Walking with help</li> <li>4. Bedridden</li> </ol>                                                                                                                                                                                                                                                                                                                                                                                                                                                                                                                                                                                                                                                                                                                                                                     | Not clear; during admission on AMU | SUHB – walking with help |
| skin integrity; problems eating; incontinence; confusion; evidence of falls; and sleep disturbance(SPICES) | <ol style="list-style-type: none"> <li>1. skin integrity;</li> <li>2. problems eating; incontinence;</li> <li>3. confusion;</li> <li>4. evidence of falls;</li> <li>5. sleep disturbance</li> </ol>                                                                                                                                                                                                                                                                                                                                                                                                                                                                                                                                                                                                                                                                                                                                                                                             | Within 24 hours of admission       | ≥2                       |

NA:Not applicable; LoS: Length of stay(days); DRG(Diagnosis-related groups); Emergency Department(ED); NH: Nursing Home; LR: Likelihood Ratio; OR: Odds Ratios; ADLS: Activities of Daily Living; CGA: Comprehensive Geriatric Assessment, AMU: Acute Medical Unit; HR: Hazard Ratio, MMSE: Mini-mental State Examination
